# Supplementary material for: Antifungal Activities of Phytochemically Characterized Hydroethanolic Extracts of Sclerocarya birrea Leaves and Stem Bark against Fluconazole-Resistant Candida albicans Strains
Source: Biomed Res Int. 2022 Jun 7;2022:4261741. doi: 10.1155/2022/4261741 (PMC9197620; doi:10.1155/2022/4261741)
Supplement: Supplementary Materials — The metabolite profiles of the 70% ethanol extracts of S. birrea leaves and stem bark are presented in the supplementary data. [file 4261741.f1.docx]

**Antifungal Activities of Phytochemically Characterized Hydroethanolic Extracts of *Sclerocarya birrea* Leaves and Stem bark against Fluconazole-Resistant *Candida albicans* strains**

Benjamin Kingsley Harley 1*, David Neglo2, Mike Okweesi Aggrey1, Anthony Martin Quagraine1, Emmanuel Orman3, Jonathan Jato1, Nana Ama Mireku-Gyimah4, Cedric Dzidzor Amengor3, Theophilus Christian Fleischer1

1Department of Pharmacognosy and Herbal Medicine, School of Pharmacy, University of Health and Allied Sciences, Ho, Ghana.

2Department of Basic Science, School of Basic and Biomedical Sciences, University of Health and Allied Sciences, Ho, Ghana.

3Department of Pharmaceutical Chemistry, School of Pharmacy, University of Health and Allied Sciences, Ho, Ghana.

4Department of Pharmacognosy and Herbal Medicine, School of Pharmacy, University of Ghana, Accra, Ghana

***Corresponding Author**

Name: Benjamin Kingsley Harley

Address: Department of Pharmacognosy and Herbal Medicine

School of Pharmacy

University of Health and Allied Sciences

P. O. Box 31

Ho- Volta Region

Ghana

Phone number: +233 265398208

E-mail address: [bkharley@uhas.edu.gh](mailto:bkharley@uhas.edu.gh)


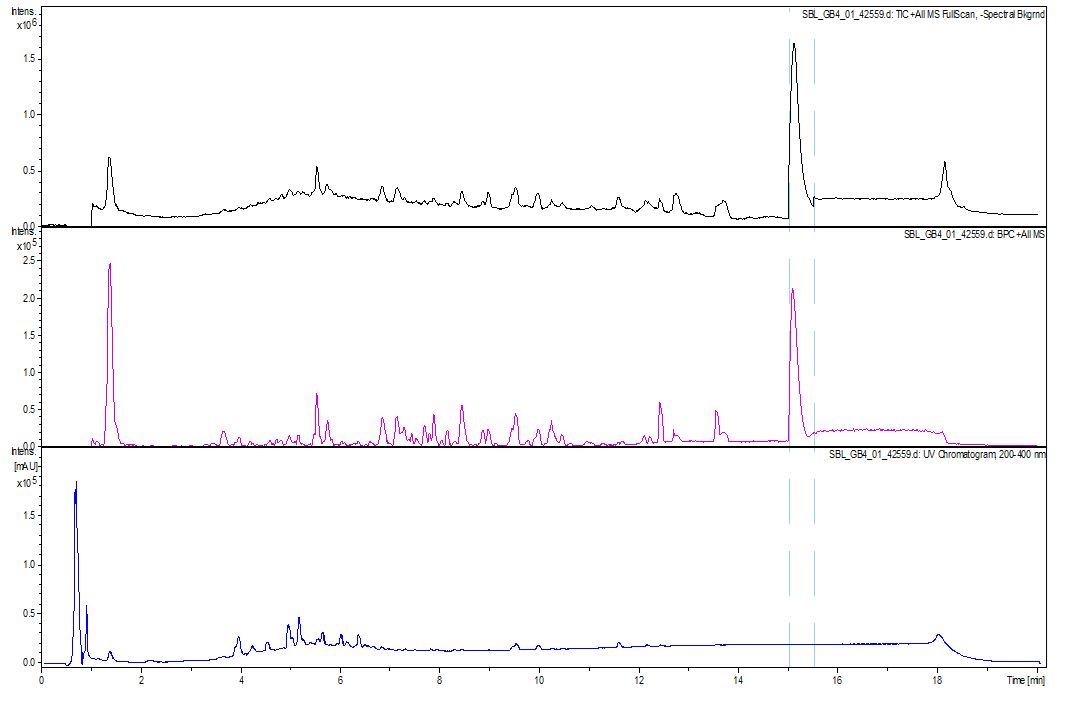


**Figure S1:** Stack layout of Total Ion, Base Peak and UV chromatograms of 70% ethanol leaves extract of *S. birrea* from the UPLC-ESI-QTOF-MS/MS Analysis.


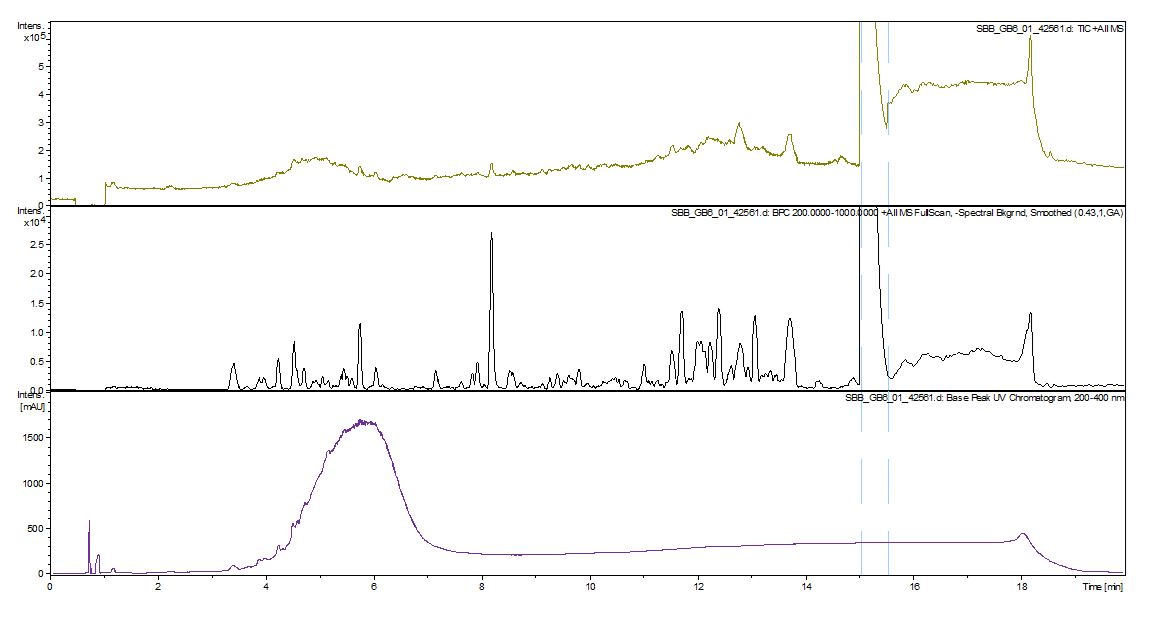


**Figure S2:** Stack layout of Total Ion, Base Peak and UV chromatograms of the 70% ethanol stem bark extract of *S. birrea* from the UPLC-ESI-QTOF-MS/MS Analysis.

**Table S1:** Proposed compounds identified in the leaves of *S. birrea* from UPLC-ESI-QTOF-MS/MS analysis

| S/N | Retention time (min) | | Observed m/z [Adduct(s)] | Monoisotopic mass | MS/MS Fragments | Accuracy (ppm/mDa) | Molecular Formula | Identification | Reference |
| --- | --- | --- | --- | --- | --- | --- | --- | --- | --- |
| 1 | 3.96 | 349.09 (M+Na) | | 326.10 | 147.04 (+1) | 4 mDa | C14H14O9 | 5-Galloyl shikimic acid | [1] |
| 2 | 4.66 | 437.23 (M+Na) | | 414.24 |  | 10 ppm | C29H50O | β-sitosterol |  |
| 3 | 4.83 | 481.25 (M+Na) | | 458.26 |  | 20 ppm | C22H18O11 | Epigallocatechin 3-O-gallate | [2, 3] |
| 4 | 5.02 | 611.16 (M+H) | | 610.16 |  | 10 ppm | C27H30O16 | Rutin | [1] |
| 5 | 5.16 | 465.10 (M+H) | | 464.10 | 325.10 (+1); 303.05 (+1) | 10 ppm | C21H20O12 | Isoquercetin | [4] |
| 6 | 5.34 | 465.20 (M+H) | | 464.19 |  | 20 ppm | C21H20O12 | Myricetin 3-O-α-L- rhamnopyranoside | [4] |
| 7 | 6.29 | 345.10 (M+H) | | 344.10 |  | 4 mDa | C14H16O10 | 5-Galloylquinic acid | [1] |
| 8 | 7.71 | 203.10 (M+Na) | | 180.11 |  | 4 mDa | C9H8O4 | Caffeic acid | [5] |
| 9 | 7.95 | 437.16 (M+H) | | 436.15 | 349.11 (+1); 295.06 (+1) | 10 ppm | C21H24O10 | Phloretin-C-glucoside | [1] |
| 10 | 11.54 | 217.11 (M+H) | | 194.12 |  | 8 mDa | C10H10O4 | Ferulic acid | [5] |
| 11 | 12.16 | 325.21 (M+Na) | | 302.22 |  | 8 mDa | C15H10O7 | Quercetin |  |
| 12 | 13.05 | 333.16 (M+H) | | 332.16 |  | 8 mDa | C13H16O10 | Galloyl glucoside isomer | [1] |
| 13 | 13.05 | 653.49 (M+Na) | | 630.51 |  | 20 ppm | C28H23O17 | Trigalloyl shikimic acid | [1] |
| 14 | 13.17 | 617.47 (M+Na) | | 594.48 |  | 10 ppm | C30H26O13 | (Epi)gallocatechin-(epi)catechin isomer | [1] |
| 15 | 14.43 | 485.38 (M+Na) | | 462.39 |  | 10 ppm |  | Pentoside derivative | [2] |

**Table S2:** Proposed compounds identified in the stem bark of *S. birrea* from UPLC-ESI-QTOF-MS/MS analysis

| S/N | Retention time (min) | | Observed m/z [Adduct(s)] | Monoisotopic mass | MS/MS Fragments | Accuracy (ppm/mDa) | Molecular Formula | Identification | Reference |
| --- | --- | --- | --- | --- | --- | --- | --- | --- | --- |
| 1 | 3.40 | 579.16 (M+H) | | 578.15 | 289.09(+1); 427.11 (+1) | 10 ppm | C30H26O12 | Procyanidin B2 | [2] |
| 2 | 3.91 | 291.09 (M+H) | | 290.08 | - | 8 mDa | C15H14O6 | Epicatechin | [2] |
| 3 | 3.96 | 867.22 (M+H) | | 866.21 | 289.08 (+1); 579.15 (+1) | 10 ppm | C45H38O18 | Procyanidin C trimer isomer |  |
| 4 | 4.23 | 579.15 (M+H) | | 578.15 | 289.08(+1); 427.11 (+1) | 10 ppm | C30H26O12 | Procyanidin B5 | [2] |
| 5 | 4.57 | 867.22 (M+H) | | 866.21 | 579.15 (+1); 163.04 (+1) | 10 ppm | C44H34O19 | (Epi)afzelechin-3-O-digallate- (epi)catechin | [1] |
| 6 | 4.71 | 731.16 (M+H) | | 730.16 | 289.07 (+1); 579.15 (+1) | 10 ppm | C37H30O16 | Procyanidin B2 3-O-gallate | [4] |
| 7 | 5.15 | 443.10 (M+H) | | 442.10 | 273.08 (+1); 139.04 (+1) | 10 ppm | C22H18O10 | Epicatechin-3-O-gallate | [2, 3] |
| 8 | 5.74 | 487.19 (M+Na) | | 464.20 | 435.20 (+1); 361.17 (+1) | 10 ppm | C21H20O12 | Myricetin 3-O-α-L- rhamnopyranoside | [2] |
| 9 | 6.16 | 193.08 (M+H) | | 192.08 | 175.08 (+1) | 4 mDa | C7H12O6 | Quinic acid | [2, 3] |
| 10 | 8.57 | 433.35 (M+H) | | 432.35 | - | 20 ppm | C21H20O10 | Kaempferol-3-rhamnoside | [2] |
| 11 | 8.57 | 455.34 (M+H) | | 454.33 | - | 10 ppm | C20H22O12 | Hydroxy-methoxyphenyl-O-galloyl-glucopyranoside | [2] |
| 12 | 9.66 | 317.24 (M+H) | | 316.24 |  | 8 mDa | C16H12O7 | Rhamnetin | [2] |
| 13 | 11.43 | 517.38 (M+Na) | | 494.39 | 261.13 (+1); 177.06 (+1) | 20 ppm | C19H26O15 | Galloyl diglucoside isomer | [1] |
| 14 | 11.46 | 473.35 (M+Na) | | 450.36 |  | 10 ppm | C21H22O11 | Eriodictyol-O-glucoside isomer | [2] |
| 15 | 11.46 | 512.42 (M+NH4) | | 494.39 |  | 20 ppm | C19H26O15 | Galloyl diglucoside isomer | [1] |
| 16 | 11.83 | 575.42 (M+Na) | | 552.43 |  | 20 ppm | C27H36O12 | Lyoniside | [2] |
| 17 | 11.83 | 605.41 (M + H) | | 604.41 |  | 20 ppm | C28H28O15 | (Epi)catechin 3-O-glucoside gallate | [2] |
| 18 | 13.17 | 617.47 (M+Na) | | 594.48 |  | 10 ppm | C30H26O13 | (Epi)gallocatechin-(epi)catechin isomer | [1] |
| 19 | 13.17 | 762.56 (M+) | | 762.56 |  | 20 ppm | C37H30O18 | (Epi)gallocatechin–(epi)gallocatechin- 3'-O-gallate | [1, 2] |
| 20 | 13.46 | 485.39 (M+H) | | 484.38 |  | 10 ppm | C20H20O14 | Digalloyl glucoside isomer | [1] |
| 21 | 13.59 | 458.35 (M+) | | 458.35 | - | 20 ppm | C22H18O11 | Epigallocatechin 3-gallate | [2, 3] |
